# Supplementary material for: Investigation of Rh–titanate (ATiO3) interactions on high-surface-area perovskite thin films prepared by atomic layer deposition
Source: Royal Society of Chemistry journal article supplement (doi:10.1039/d0ta05981a), 2020-01-01
Supplement: d0ta05981a1.pdf [file d0ta05981a1.pdf]

Investigation of Rh-titanate ( $\text{ATiO}_3$ ) interactions on high-surface-area perovskites  
thin films prepared by atomic layer deposition

*Chao Lin<sup>a</sup>, Alexandre C. Foucher<sup>b</sup>, Yichen Ji<sup>a</sup>, Eric A. Stach<sup>b</sup> & Raymond J. Gorte<sup>a,\*</sup>*

<sup>a</sup> Department of Chemical and Biomolecular Engineering, University of Pennsylvania, 34th Street, Philadelphia, PA 19104, United States

<sup>b</sup> Department of Materials Science and Engineering, University of Pennsylvania, Philadelphia, PA 19104, United States

**KEYWORDS**

CO oxidation; Atomic Layer Deposition (ALD); “Intelligent” catalyst; Rh catalyst;  $\text{CaTiO}_3$ ,  $\text{SrTiO}_3$ ,  $\text{BaTiO}_3$ , perovskites.

## SUPPORTING INFORMATION

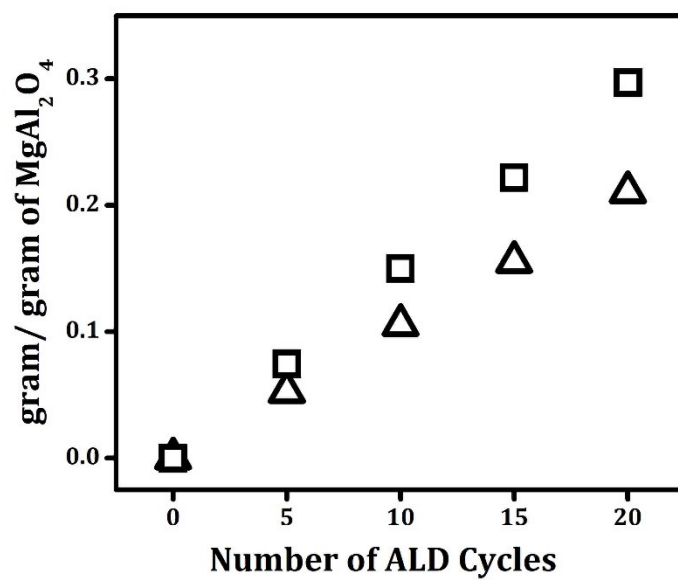

**Figure S1.** Growth curves for ALD films on a 120m<sup>2</sup>/g MgAl<sub>2</sub>O<sub>4</sub> support for (Δ) Sr-ALD process and (□) Ba-ALD process

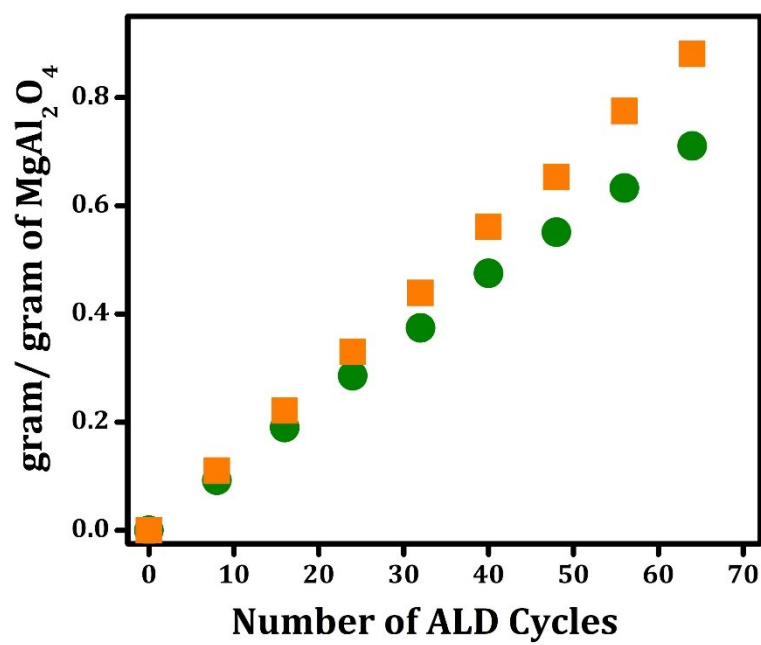

**Figure S2.** Growth curves for ALD films on a 120m<sup>2</sup>/g MgAl<sub>2</sub>O<sub>4</sub> support for (●) SrTiO<sub>3</sub>/MgAl<sub>2</sub>O<sub>4</sub> and (■) BaTiO<sub>3</sub>/MgAl<sub>2</sub>O<sub>4</sub> process.

**Table S2.** Results from Rietveld analysis of the XRD patterns of the  $\text{CaTiO}_3/\text{MgAl}_2\text{O}_4$  after high temperature redox cycles, in comparison with the cell parameters reported for the parent pure phases.

|                                                          | $\text{CaTiO}_3/\text{MgAl}_2\text{O}_4$ |                                              | Parent pure phase                            |
|----------------------------------------------------------|------------------------------------------|----------------------------------------------|----------------------------------------------|
| Phase (Space Group)                                      | Amount (wt%)                             | Cell parameters (nm)                         | Cell parameters (nm)                         |
| $\text{MgAl}_2\text{O}_4$ ( $\text{Fd}\bar{3}\text{m}$ ) | 76.5%                                    | $a = 0.8008$                                 | $a = 0.8081$                                 |
| $\text{CaTiO}_3$ ( $\text{Pnma}$ )                       | 23.5%                                    | $a = 0.5435$<br>$b = 0.7662$<br>$c = 0.5389$ | $a = 0.5442$<br>$b = 0.7640$<br>$c = 0.5380$ |

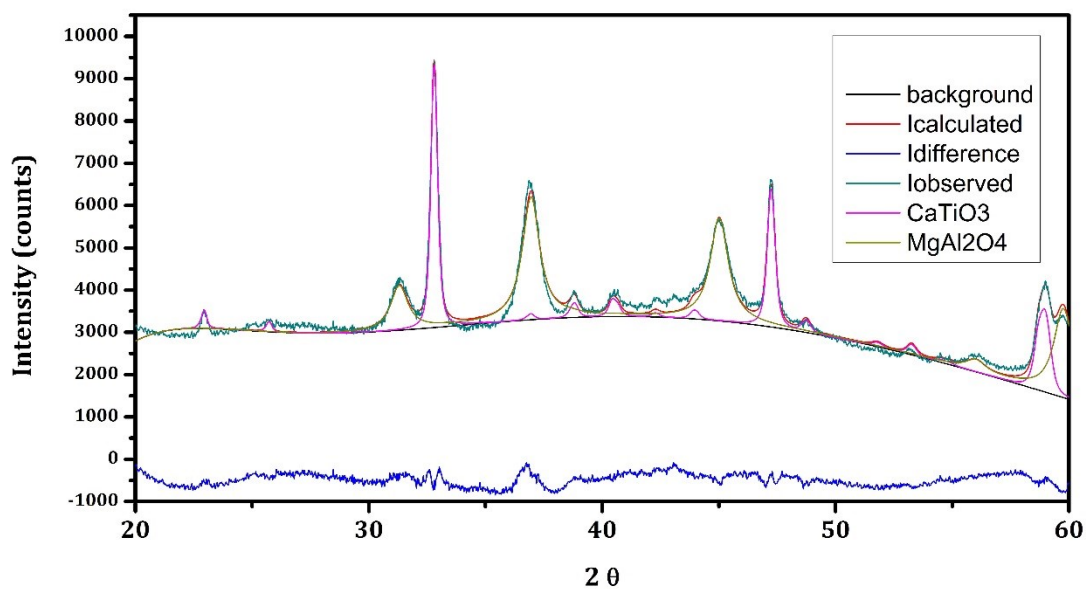

**Figure S3.** Rietveld refinement for the  $\text{CaTiO}_3/\text{MgAl}_2\text{O}_4$  samples.

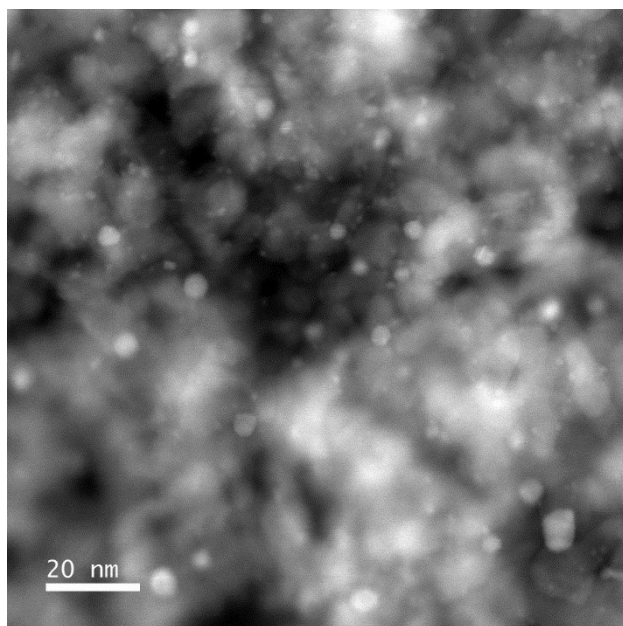

**Figure S4.** STEM result for Rh/MgAl<sub>2</sub>O<sub>4</sub>, after five 1073-K redox cycles, with the final step being reduction.

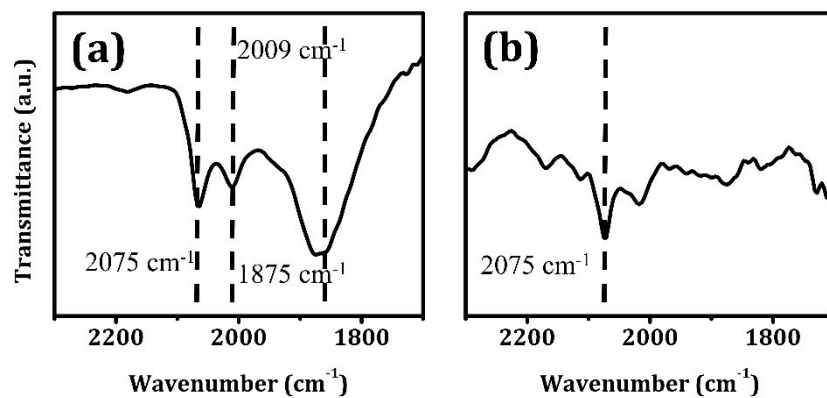

**Figure S5.** FTIR patterns obtained for (a) Rh/CaO/MgAl<sub>2</sub>O<sub>4</sub> and (b) Rh/TiO<sub>2</sub>/MgAl<sub>2</sub>O<sub>4</sub> after exposure to CO at room temperature after five 1073 K redox cycles with the final treatment being reduction.

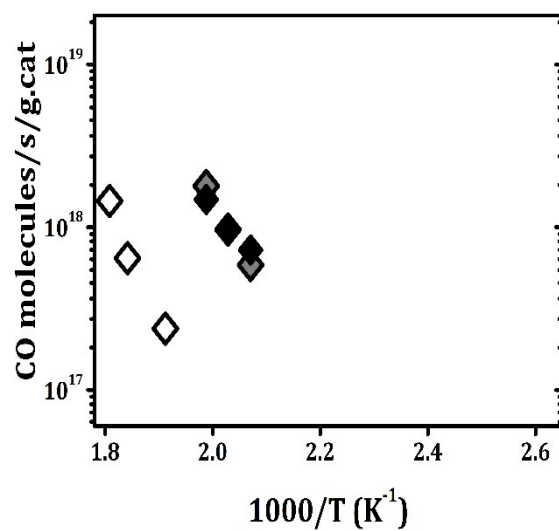

**Figure S6.** Steady-state, differential reaction rates for CO oxidation with 25 Torr of CO and 12.5 Torr O<sub>2</sub> for Rh/CaTiO<sub>3</sub>/MgAl<sub>2</sub>O<sub>4</sub> with extra Ca (Ca:Ti=1.1) as a function of reduction temperature. Reduction pretreatment temperature: (white) no reduction, (grey) 573 K reduction, and (black) 1073 K reduction.

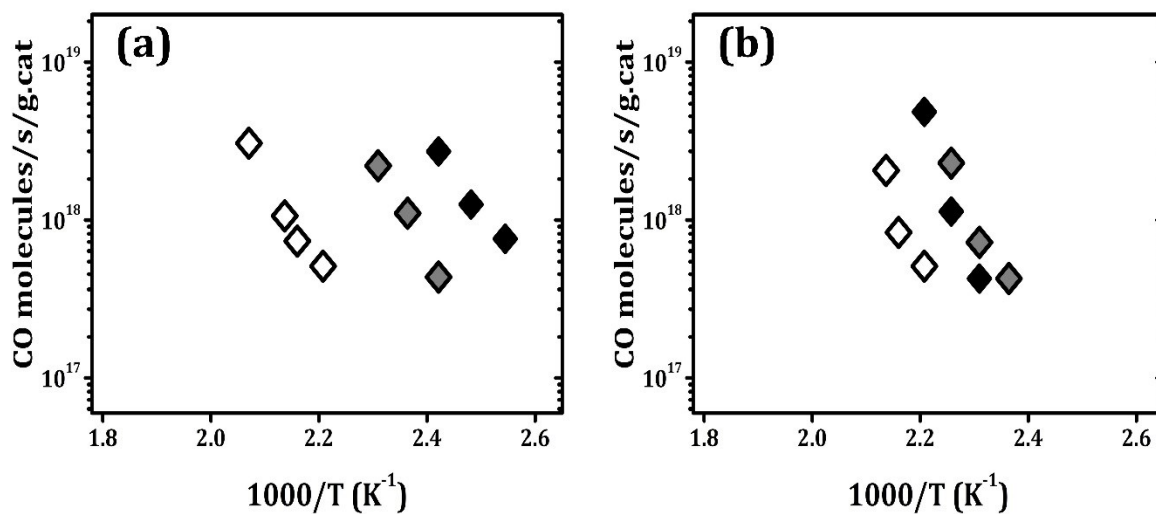

**Figure S7.** Steady-state, differential reaction rates for CO oxidation with 25 Torr of CO and 12.5 Torr O<sub>2</sub> for (a) Rh/CaO/MgAl<sub>2</sub>O<sub>4</sub> (b) Rh/TiO<sub>2</sub>/MgAl<sub>2</sub>O<sub>4</sub> as a function of reduction temperature. Reduction pretreatment temperature: (white) no reduction, (grey) 573K reduction and (black) 1073K reduction.

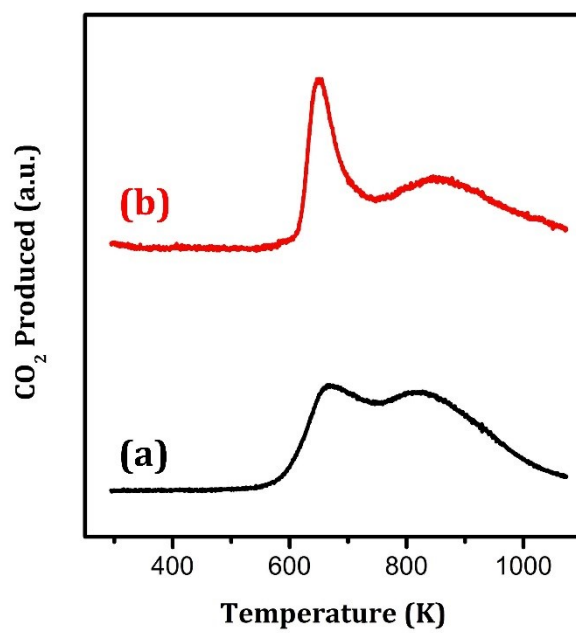

**Figure S8.** CO-TPR profile for (a)Rh/CaO/MgAl<sub>2</sub>O<sub>4</sub> and (b)Rh/TiO<sub>2</sub>/MgAl<sub>2</sub>O<sub>4</sub>
